# Supplementary material for: SARS-CoV-2 Z-RNA activates the ZBP1-RIPK3 pathway to promote virus-induced inflammatory responses
Source: Springer Nature journal article supplement (doi:10.1038/s41422-022-00775-y), 2023-01-17
Supplement: MOESM10 [file 41422_2022_775_MOESM10_ESM.pdf]

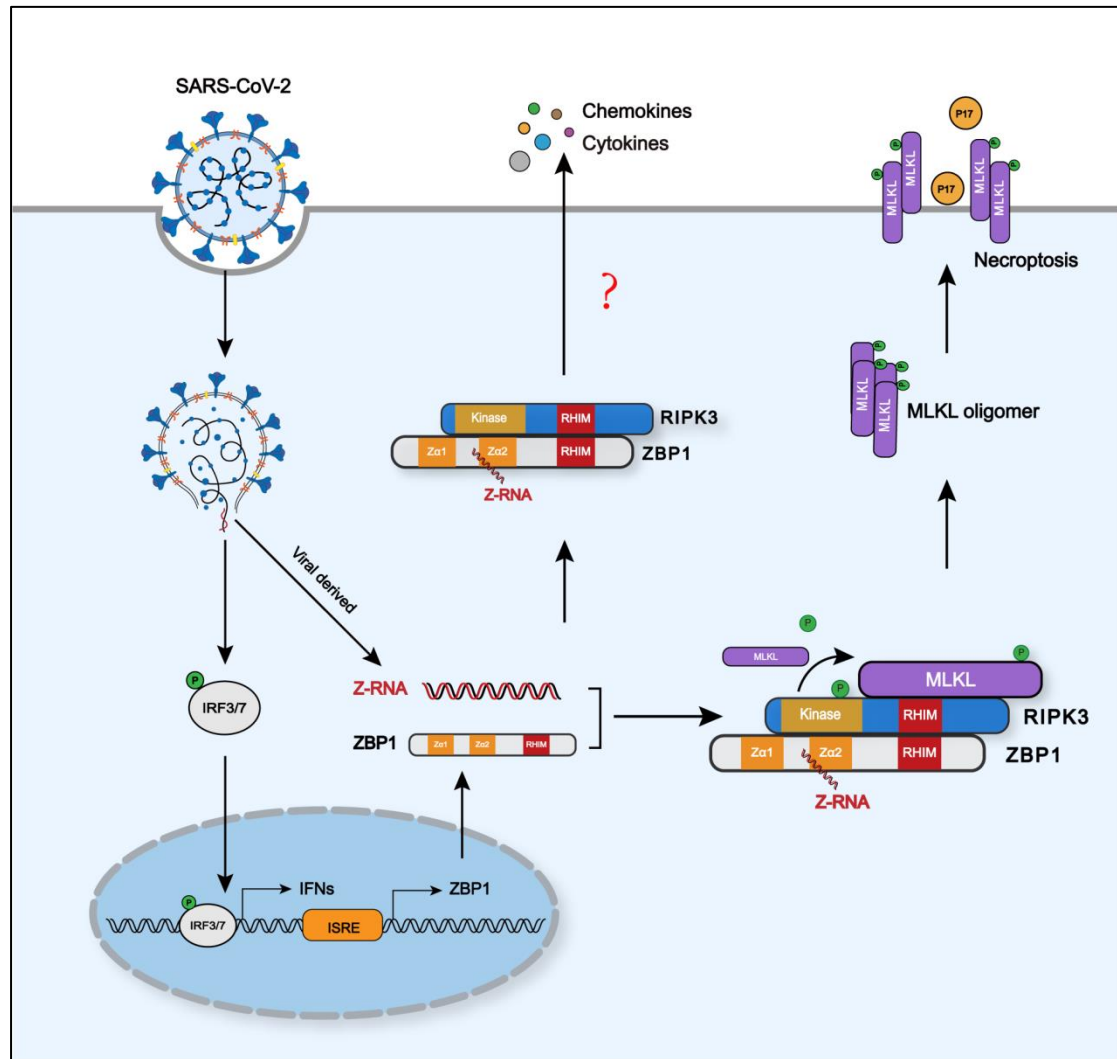

Supplementary information, Fig. S10 A proposed model of inflammatory responses triggered by SARS-CoV-2 infection.
